# Supplementary material for: Impact of Tumor HER2/ERBB2 Expression Level on HER2-Targeted Liposomal Doxorubicin-Mediated Drug Delivery: Multiple Low-Affinity Interactions Lead to a Threshold Effect
Source: Oxford University Press journal article supplement (doi:10.1158/1535-7163.mct-13-0180), 2013-05-31
Supplement: 15357163mct130180-sup-desc.xls [file 15357163mct130180-sup-desc.xls]

## Sheet: Sheet1
DESCRIPTION
Eytan Doxorubicin / Pgp Model. PMID: 10331240
It is assumed that Pgp extracts compounds from the inner leaflet of the membrane.
MODEL IMAGE: DoxCellUptakeModelImage.jpg
COMPARTMENTS
Name	Size	Units	Parent	Comments
m20_Medium	0	L
m20_Cell	0	L	m20_Medium
PARAMETERS
Name	Value	Units	Comments	Lower Bound	Upper Bound	Mean	Stdev		Description	Notes
			DOXORUBICIN PARAMETERS:
InitialDox_ug_per_ml	0	ug/ml
InitialDox_nM	0	nM
InitialHER2tPLD_ug_per_ml	1	ug/ml
MW_dox	580	g/mol
doxperliposome	20000
doxpartitioncoefficient	40000		From Eytan et al.
Pgp_Vmax	0	nmol/cell/min	5-50 nmol/1e9 cells/sec (PMID: 10331240, p210)
Pgp_Km	1000	nM	Pgp_Km = Km*doxpartitioncoefficient
kf_ol	3.39e-06	dm/min							Typical cell permeability ~1e-6 cm/s
kf_il	0	dm/min	SET IN RULES = kf_ol
kr_ol	0		SET IN RULES
kr_il	0		SET IN RULES
kf_DNA	0	1/nM/min	SET IN RULES
Ka_DNA	0.001	1/nM	Based on Ka_DNA = 1e6 1/M; (PMID: 498422, 7370266, 2765536, 2223830, 2706251, 3163925, 4672222, 4672222)
kr_DNA	1200	1/min	10-30 1/s (PMID: 3856431, 9555082)
nucleotides_per_cell	45800000	#/cell	Effective nucleotide amount … Fit to data in (PMID: 3162810) assuming 0.18 binding sites/nucleotide: 11 uM concentration of dox in nucleus with 0.1 uM dox incubation @ 4 hr ==> 4.58e7 nuclt/cell Roughly 1% of total nucleotides. It appears that the number must be greater than 4e7 to match nuclear dox data from PMID: 18686132. Compromise at 6e8 nucleotides/cell (1/10th of max).
bindingsites_per_nucleotide	0.18		number of binding sites per nucleotide 0.1-0.24; (PMID: 498422, 7370266, 2765536, 719643, 4672222, & Zunio et al. Biochim Biophys Acta 1972, 277: 489-498)
kflippase_in	1	1/min	lifetime = 60 sec (PMID: 10331240)
kflippase_out	0.37	1/min	0.37 = From Hendriks, et al (under review)
			LIPOSOME PARAMETERS:
kf_LR	0.012	1/nM/min	Assume kf ~ 1e6 1/M/s based on PMIDs: 1586339, 11393849, 16933106 (range = 3.7e5 - 2.5e6 1/M/s)
kr_LR	0	1/min	SET IN RULES
Kd	160	nM	F5
alpha	3.1		2D enhancement factor
liposomeradius	5e-07	dm	50 nm = 5e-7 dm
liposomeprojectedarea	0		SET IN RULES
kdeg_lipo	0.00433661	1/min	lipid (intact or broken down liposome) expulsion rate from the cell
krel_medium	5.465e-05	1/min	Dox release rate from liposome; Based on Doxil literature - t1/2 = 48 hr
krel_cell	0.00096	1/min	Dox release rate from liposome within cells; assume t1/2 = 12 hr based on some of our crude microscopy efforts
			CELL PARAMETERS:
cellsurfacearea	0	dm^2	decimeters^2; calculate in RULES based on cellradius, assuming spherical cell
cellvolume	0	L	calculated in RULES, based on cellradius, assuming spherical cell
cellradius	8.5e-05	dm	9 um = approximate cell radius of BT-474, SKBr3 or MCF-7 (PMID: 16631082)
frxnvol_outerleaflet	5e-05		PMID: 10331240
frxnvol_innerleaflet	5e-05		PMID: 10331240
numberofcells	50000
FrxnSurfaceAvailable	0.5		fraction of cell surface area available for binding; experiment performed in suspension --> 1
FrxnReceptorsAvailable	1
ke_fluidphase	1.58681e-15	L/min/cell	fluid-phase uptake = 4e-14 L/min/cell (Receptors Book (B82 fibroblasts))
			HER2 TRAFFICKING:
ke_HER2	0.0365737	1/min
ke_xlinked	0.0363008	1/min	SET IN RULES
ke_value	0.036	1/min	ESTIMATED (average of ke_HER2 & ke_xlinked)
kdeg_HER2	1.01544e-05	1/min	constitutive degradation rate
ksyn_HER2	0	nmol/min/cell	SET IN RULES
kx_HER2lipo	0.0995543	1/min	HER2 recycling following liposome-mediated internalization; ESTIMATED
kdeg_HER2lipo	0.156325		HER2 degradation following liposome-mediated internalization; ESTIMATED
TotalSurfaceHER2	1600000	#/cell
			MISC PARAMETERS:
Nav	602200000000000	#/nmol
mediumvolume	0.003	L
switch2	1		these are binary switches that let you turn individual cross-linking reactions on (1) or off (0)
switch3	1
switch4	1
switch5	0		<-- based on fitting - estimate of a maximum of 4 HER2 bound
switch6	1
switch7	1
switch8	1
switch9	1
switch10	1
switch11	1
switch12	1
switch13	1
switch14	1
switch15	1
switch16	1
switch17	1
switch18	1
switch19	1
switch20	1
REACTIONS
Name	Expression A		Expression B	Rxn Type	Expression C	Expression D	Expression E		Compartment	Kinetic Law	kf/Km/ktrans	kr/Vmax/kappa		NOTES
rxn1			[m20_Medium].[dox]	<->	[m20_Cell].[dox_outerleaflet]					DiffusiveTransport	kf_ol*cellsurfacearea*numberofcells	1/doxpartitioncoefficient/frxnvol_outerleaflet	kr_ol/frxnvol_innerleaflet
rxn2			dox_outerleaflet	<->	dox_innerleaflet				m20_Cell	MassAction	kflippase_in/frxnvol_outerleaflet	kflippase_out/frxnvol_innerleaflet
rxn3			[m20_Cell].[dox_cytoplasm]	<->	[m20_Cell].[dox_innerleaflet]					DiffusiveTransport	kf_il*cellsurfacearea*numberofcells	1/doxpartitioncoefficient/frxnvol_innerleaflet	kr_il/frxnvol_innerleaflet
rxn4	dox_cytoplasm	+	DNA	<->	dox_DNA				m20_Cell	MassAction	kf_DNA	kr_DNA
rxn5			[m20_Cell].[dox_innerleaflet]	->	[m20_Medium].[dox]					Michaelis-Menten	Pgp_Km	Pgp_Vmax*numberofcells
			[m20_Medium].[lipo]	->	[m20_Cell].[lipo_internal]					ConvectiveTransport	ke_fluidphase*numberofcells
rxn20	[m20_Medium].[lipo]	+	[m20_Cell].[HER2_surface]	<->	[m20_Cell].[LR_surface]					MassAction	[kf_LR]*(m20_beta)*[m20_Cell]	kr_LR
rxn21	LR_surface	+	HER2_surface	<->	LR2_surface				m20_Cell	MassAction	kf_LR*alpha*switch2	2*kr_LR
rxn21	LR2_surface	+	HER2_surface	<->	LR3_surface				m20_Cell	MassAction	kf_LR*alpha*switch3	3*kr_LR
rxn21	LR3_surface	+	HER2_surface	<->	LR4_surface				m20_Cell	MassAction	kf_LR*alpha*switch4	4*kr_LR
rxn21	LR4_surface	+	HER2_surface	<->	LR5_surface				m20_Cell	MassAction	kf_LR*alpha*switch5	5*kr_LR
rxn21	LR5_surface	+	HER2_surface	<->	LR6_surface				m20_Cell	MassAction	kf_LR*alpha*switch6	6*kr_LR
rxn21	LR6_surface	+	HER2_surface	<->	LR7_surface				m20_Cell	MassAction	kf_LR*alpha*switch7	7*kr_LR
rxn21	LR7_surface	+	HER2_surface	<->	LR8_surface				m20_Cell	MassAction	kf_LR*alpha*switch8	8*kr_LR
rxn21	LR8_surface	+	HER2_surface	<->	LR9_surface				m20_Cell	MassAction	kf_LR*alpha*switch9	9*kr_LR
rxn21	LR9_surface	+	HER2_surface	<->	LR10_surface				m20_Cell	MassAction	kf_LR*alpha*switch10	10*kr_LR
rxn21	LR10_surface	+	HER2_surface	<->	LR11_surface				m20_Cell	MassAction	kf_LR*alpha*switch11	11*kr_LR
rxn21	LR11_surface	+	HER2_surface	<->	LR12_surface				m20_Cell	MassAction	kf_LR*alpha*switch12	12*kr_LR
rxn21	LR12_surface	+	HER2_surface	<->	LR13_surface				m20_Cell	MassAction	kf_LR*alpha*switch13	13*kr_LR
rxn21	LR13_surface	+	HER2_surface	<->	LR14_surface				m20_Cell	MassAction	kf_LR*alpha*switch14	14*kr_LR
rxn21	LR14_surface	+	HER2_surface	<->	LR15_surface				m20_Cell	MassAction	kf_LR*alpha*switch15	15*kr_LR
rxn21	LR15_surface	+	HER2_surface	<->	LR16_surface				m20_Cell	MassAction	kf_LR*alpha*switch16	16*kr_LR
rxn21	LR16_surface	+	HER2_surface	<->	LR17_surface				m20_Cell	MassAction	kf_LR*alpha*switch17	17*kr_LR
rxn21	LR17_surface	+	HER2_surface	<->	LR18_surface				m20_Cell	MassAction	kf_LR*alpha*switch18	18*kr_LR
rxn21	LR18_surface	+	HER2_surface	<->	LR19_surface				m20_Cell	MassAction	kf_LR*alpha*switch19	19*kr_LR
rxn21	LR19_surface	+	HER2_surface	<->	LR20_surface				m20_Cell	MassAction	kf_LR*alpha*switch20	20*kr_LR
rxn22			LR_surface	->	lipo_internal	HER2_internal			m20_Cell	MassAction	ke_HER2
rxn22			LR2_surface	->	lipo_internal	2 HER2_internal			m20_Cell	MassAction	ke_xlinked
rxn22			LR3_surface	->	lipo_internal	3 HER2_internal			m20_Cell	MassAction	ke_xlinked
rxn22			LR4_surface	->	lipo_internal	4 HER2_internal			m20_Cell	MassAction	ke_xlinked
rxn22			LR5_surface	->	lipo_internal	5 HER2_internal			m20_Cell	MassAction	ke_xlinked
rxn22			LR6_surface	->	lipo_internal	6 HER2_internal			m20_Cell	MassAction	ke_xlinked
rxn22			LR7_surface	->	lipo_internal	7 HER2_internal			m20_Cell	MassAction	ke_xlinked
rxn22			LR8_surface	->	lipo_internal	8 HER2_internal			m20_Cell	MassAction	ke_xlinked
rxn22			LR9_surface	->	lipo_internal	9 HER2_internal			m20_Cell	MassAction	ke_xlinked
rxn22			LR10_surface	->	lipo_internal	10 HER2_internal			m20_Cell	MassAction	ke_xlinked
rxn22			LR11_surface	->	lipo_internal	11 HER2_internal			m20_Cell	MassAction	ke_xlinked
rxn22			LR12_surface	->	lipo_internal	12 HER2_internal			m20_Cell	MassAction	ke_xlinked
rxn22			LR13_surface	->	lipo_internal	13 HER2_internal			m20_Cell	MassAction	ke_xlinked
rxn22			LR14_surface	->	lipo_internal	14 HER2_internal			m20_Cell	MassAction	ke_xlinked
rxn22			LR15_surface	->	lipo_internal	15 HER2_internal			m20_Cell	MassAction	ke_xlinked
rxn22			LR16_surface	->	lipo_internal	16 HER2_internal			m20_Cell	MassAction	ke_xlinked
rxn22			LR17_surface	->	lipo_internal	17 HER2_internal			m20_Cell	MassAction	ke_xlinked
rxn22			LR18_surface	->	lipo_internal	18 HER2_internal			m20_Cell	MassAction	ke_xlinked
rxn22			LR19_surface	->	lipo_internal	19 HER2_internal			m20_Cell	MassAction	ke_xlinked
rxn22			LR20_surface	->	lipo_internal	20 HER2_internal			m20_Cell	MassAction	ke_xlinked
			[m20_Cell].[lipo_internal]	->	[m20_Medium].[lipo]					MassAction	kdeg_lipo
			HER2_internal	->	HER2_surface				m20_Cell	MassAction	kx_HER2lipo
			HER2_internal	->	null				m20_Cell	MassAction	kdeg_HER2lipo
			null	->	HER2_surface				m20_Cell	MassAction	ksyn_HER2*numberofcells
			HER2_surface	->	null				m20_Cell	MassAction	kdeg_HER2
			lipo	->	20000 dox	lipid			m20_Medium	MassAction	krel_medium
			lipo_internal	->	20000 dox_cytoplasm	lipid			m20_Cell	MassAction	krel_cell
			[m20_Cell].[lipid]	->	[m20_Medium].[lipid]					MassAction	kdeg_lipo
SPECIES
Name	Compartment	Initial Amount	Initial Concentration	Units		Lower Bound	Upper Bound
RULES
Name	Variable	Rule Type	Expression
	cellvolume	InitialAssignment	4/3*pi*cellradius^3
	cellsurfacearea	InitialAssignment	4*pi*cellradius^2
	liposomeprojectedarea	InitialAssignment	pi*liposomeradius^2
	m20_Medium	InitialAssignment	mediumvolume
	m20_Cell	InitialAssignment	numberofcells*cellvolume
	ksyn_HER2	InitialAssignment	TotalSurfaceHER2*FrxnReceptorsAvailable/Nav*kdeg_HER2*FrxnSurfaceAvailable
	[m20_Cell].[HER2_surface]	InitialAssignment	ksyn_HER2/cellvolume/kdeg_HER2
	[m20_Cell].[DNA]	InitialAssignment	nucleotides_per_cell*bindingsites_per_nucleotide/Nav/cellvolume
	[m20_Medium].[dox]	InitialAssignment	InitialDox_nM + InitialDox_ug_per_ml*1e6/MW_dox
	[m20_Medium].[lipo]	InitialAssignment	InitialHER2tPLD_ug_per_ml*1e6/MW_dox/doxperliposome
	kf_DNA	InitialAssignment	Ka_DNA*kr_DNA
	kf_il	InitialAssignment	kf_ol
	kr_ol	InitialAssignment	kf_ol/doxpartitioncoefficient
	kr_il	InitialAssignment	kf_il/doxpartitioncoefficient
	kr_LR	InitialAssignment	Kd*kf_LR
	ke_HER2	InitialAssignment	ke_value
	ke_xlinked	InitialAssignment	ke_value
	m20_TotalSurfaceBoundLipo	RepeatedAssignment	[m20_Cell].[LR_surface]+[m20_Cell].[LR2_surface]+[m20_Cell].[LR3_surface]+[m20_Cell].[LR4_surface]+[m20_Cell].[LR5_surface]+[m20_Cell].[LR6_surface]+[m20_Cell].[LR7_surface]+[m20_Cell].[LR8_surface]+[m20_Cell].[LR9_surface]+[m20_Cell].[LR10_surface]+[m20_Cell].[LR11_surface]+[m20_Cell].[LR12_surface]+[m20_Cell].[LR13_surface]+[m20_Cell].[LR14_surface]+[m20_Cell].[LR15_surface]+[m20_Cell].[LR16_su…
	m20_TotalInternalLipo	RepeatedAssignment	[m20_Cell].[lipo_internal]+[m20_Cell].[lipid]
	m20_beta	RepeatedAssignment	(1-m20_TotalSurfaceBoundLipo*Nav*cellvolume/(cellsurfacearea*FrxnSurfaceAvailable/liposomeprojectedarea))
	m20_TotalCellFreeDox_nM	RepeatedAssignment	[m20_Cell].[dox_outerleaflet]+[m20_Cell].[dox_innerleaflet]+[m20_Cell].[dox_cytoplasm]+[m20_Cell].[dox_DNA]
	m20_TotalInternalDox_nM	RepeatedAssignment	m20_TotalCellFreeDox_nM + ([m20_Cell].[lipo_internal])*doxperliposome
	m20_TotalCellAssociatedDox_nM	RepeatedAssignment	m20_TotalCellFreeDox_nM + (m20_TotalSurfaceBoundLipo+[m20_Cell].[lipo_internal])*doxperliposome
	m20_TotalCellAssociatedDox_ng_per_25000cells	RepeatedAssignment	m20_TotalCellAssociatedDox_nM*cellvolume*MW_dox*25000
	m20_TotalCellAssociatedDox_fg_per_cell	RepeatedAssignment	m20_TotalCellAssociatedDox_nM*cellvolume*MW_dox*1e6
	m20_TotalInternalDox_fg_per_cell	RepeatedAssignment	m20_TotalInternalDox_nM*cellvolume*MW_dox*1e6
	m20_LiposomesPerCell_doxbasis	RepeatedAssignment	m20_TotalCellAssociatedDox_nM*cellvolume/doxperliposome*Nav
	m20_LiposomesPerCell_lipidbasis	RepeatedAssignment	(m20_TotalSurfaceBoundLipo+m20_TotalInternalLipo)*cellvolume*Nav
EVENTS
Name	Trigger	Event Function
REPORT
Name
SIMULATION
Option	Value
StopTime	1440
DimensionalAnalysis	FALSE
AbsoluteTolerance	1e-10
RelativeTolerance	1e-10
